# Supplementary material
Source: publisher figshare collection journal article supplement (https://plos.figshare.com/articles/dataset/_/5046127)

**A**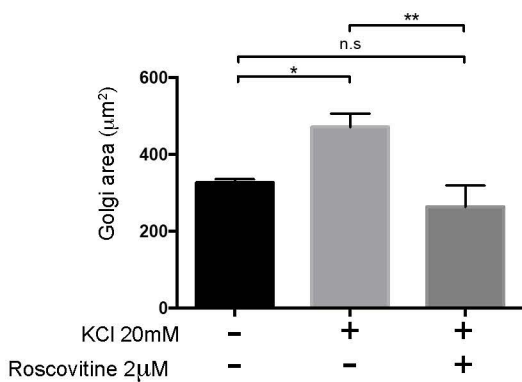**B**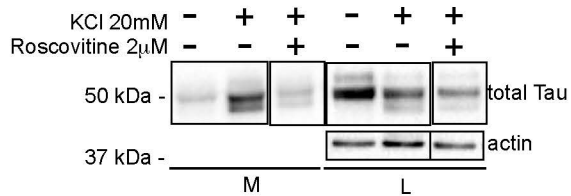**C**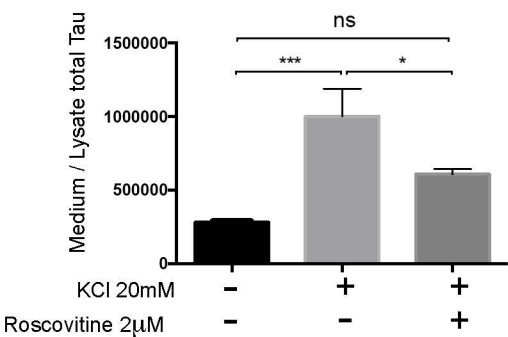**D**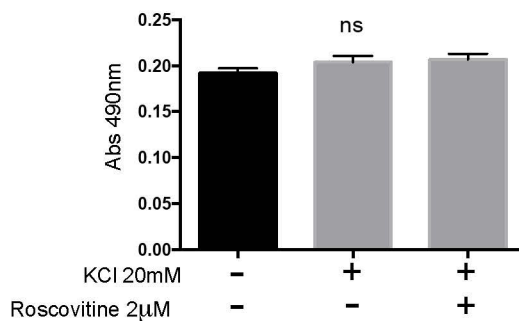

Supplement: Supplementary file [file 1]
