# Supplementary material
Source: publisher figshare collection journal article supplement (https://plos.figshare.com/articles/dataset/_/5046127)

Western Blots Fig1A

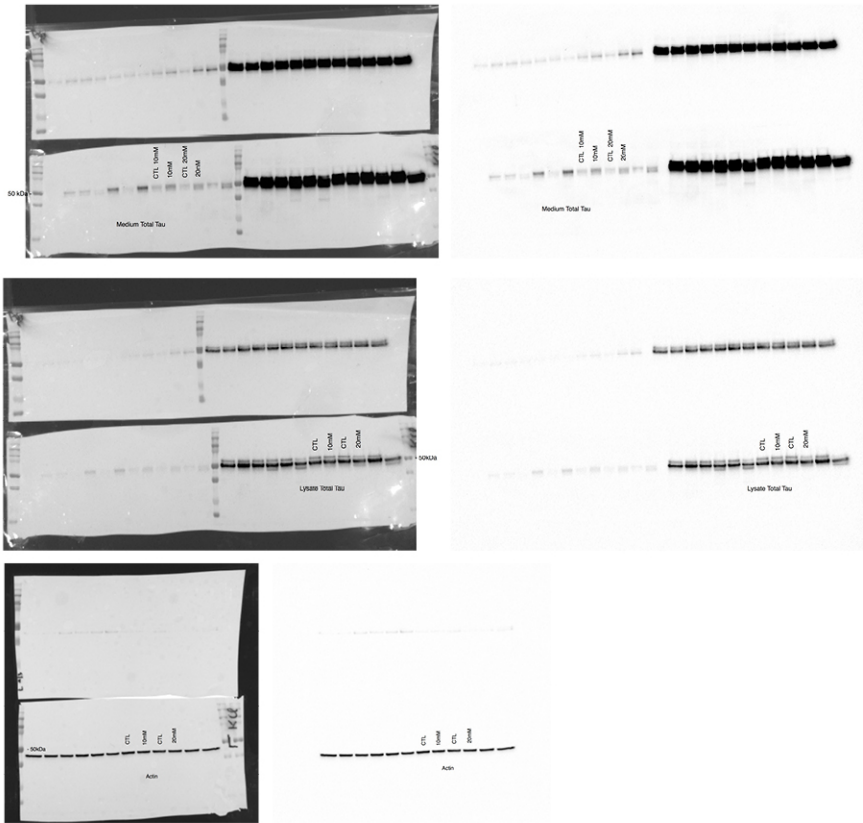

Western Blots Fig3A

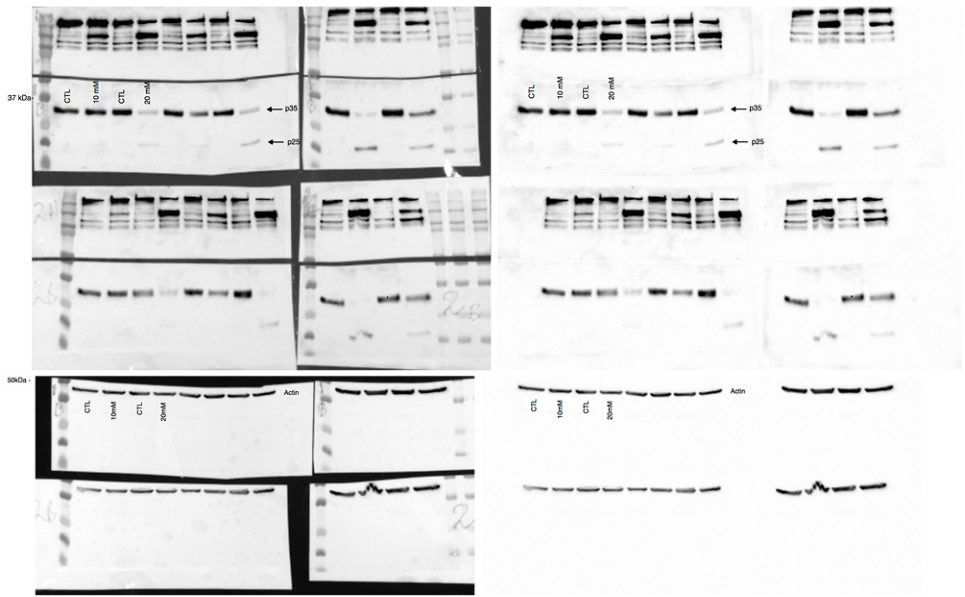

Western Blots Fig4A

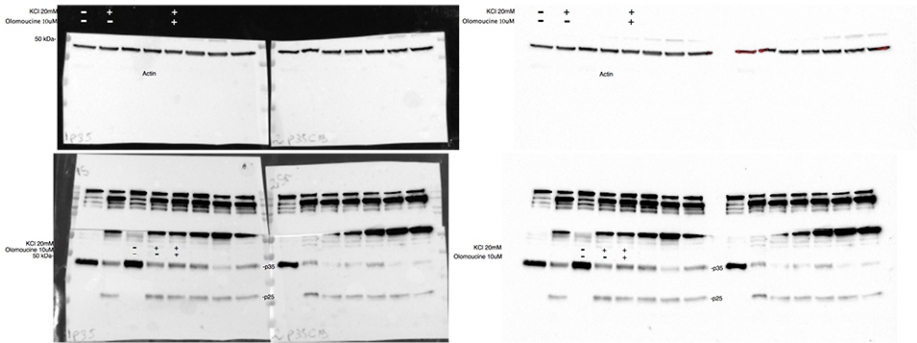

Western Blots Fig4E

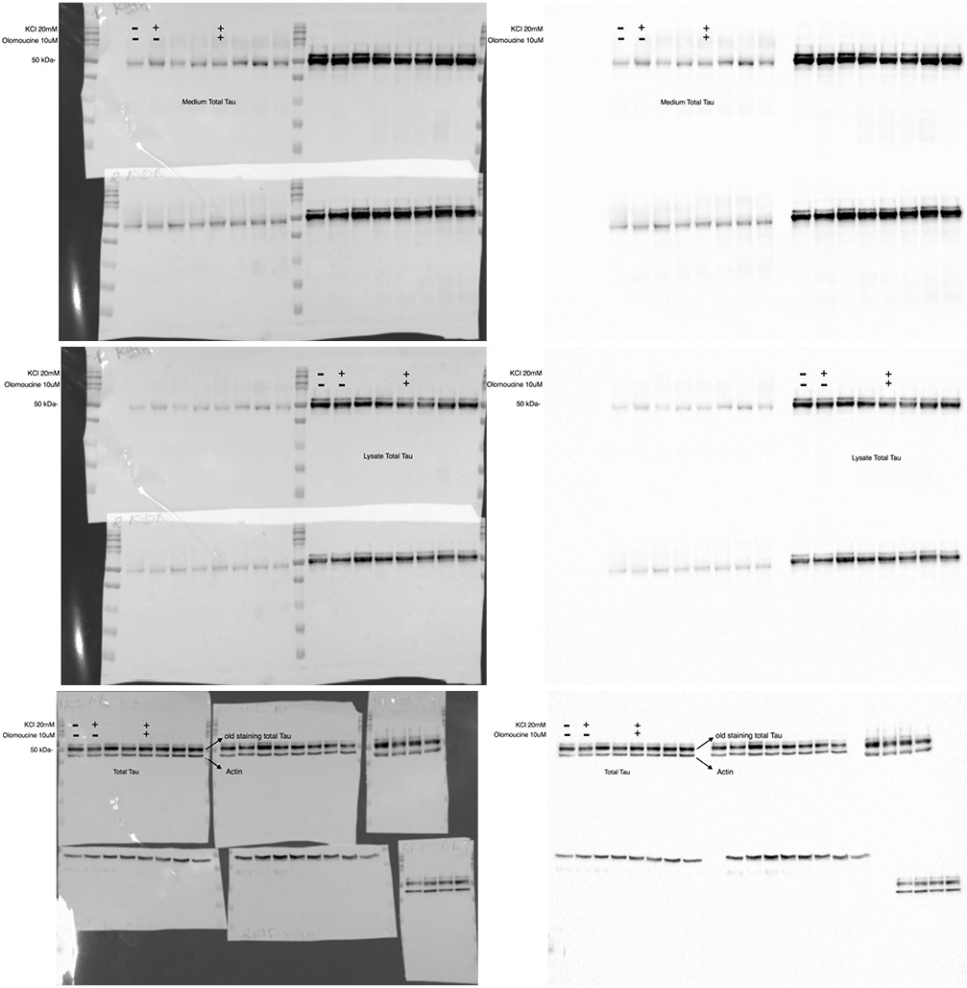

Western Blots Fig5

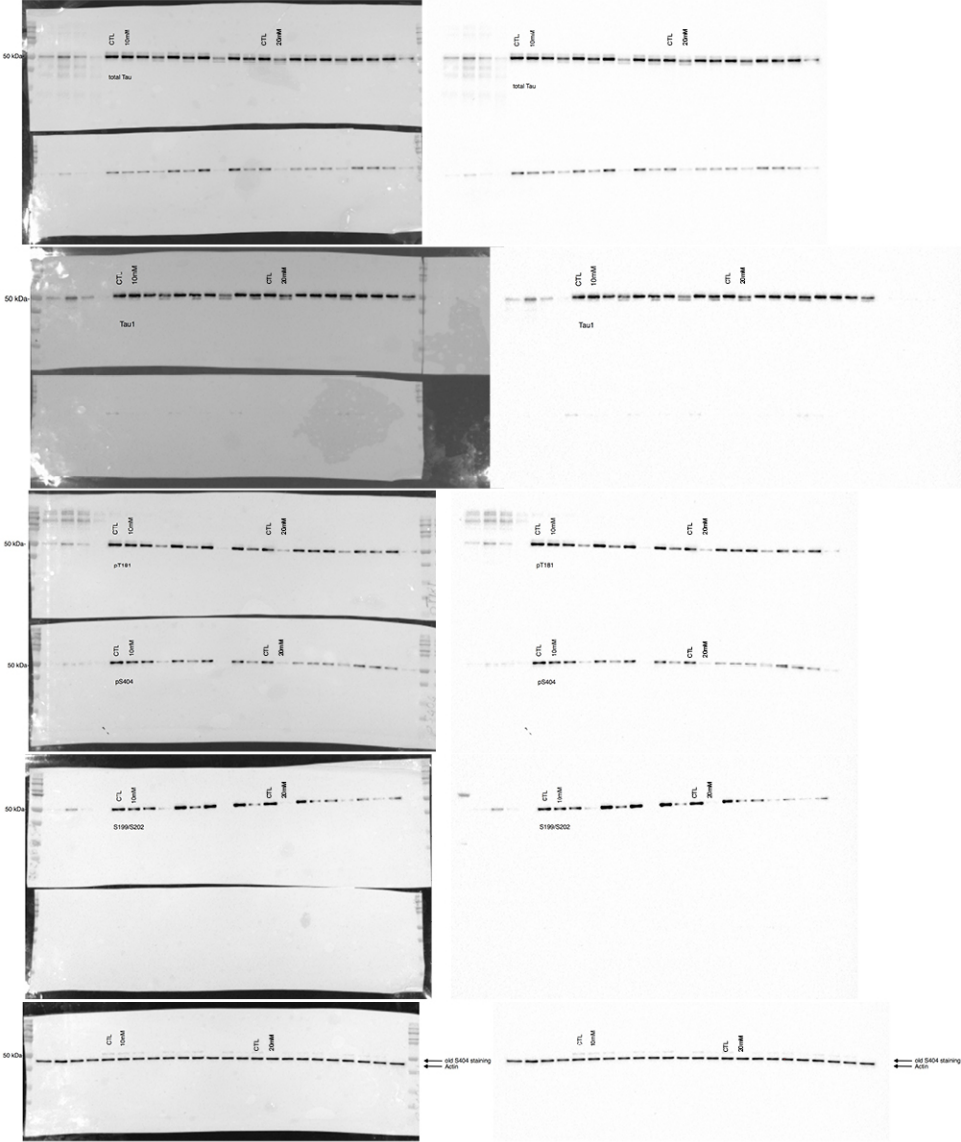

**Western Blots Fig5**

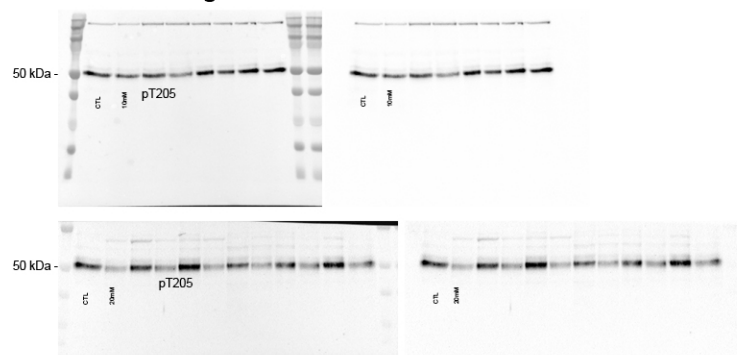

Western Blots Fig6B

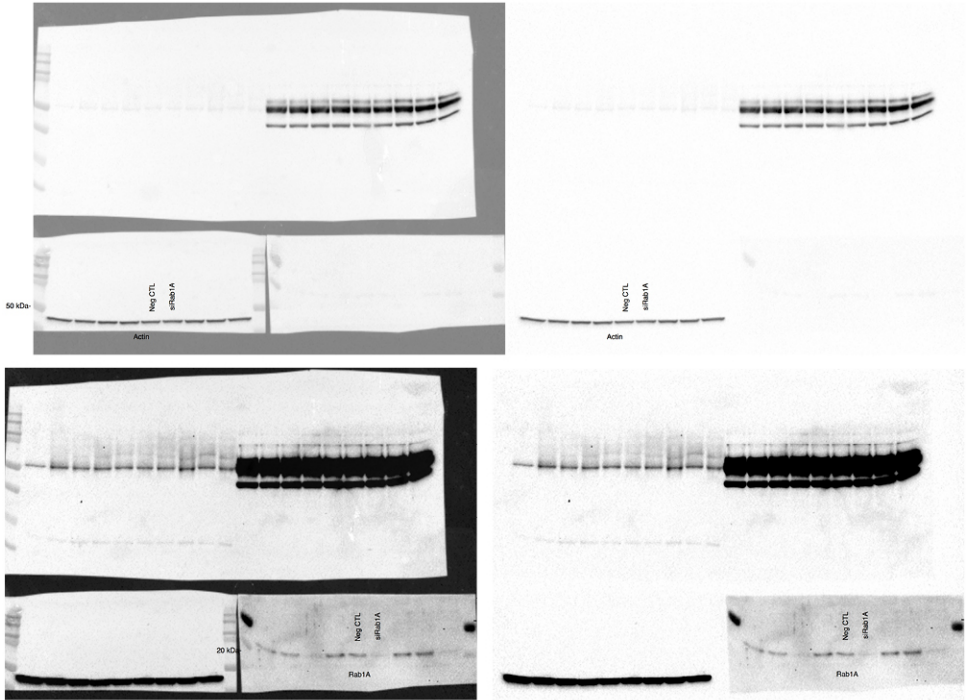

Western Blots Fig6E

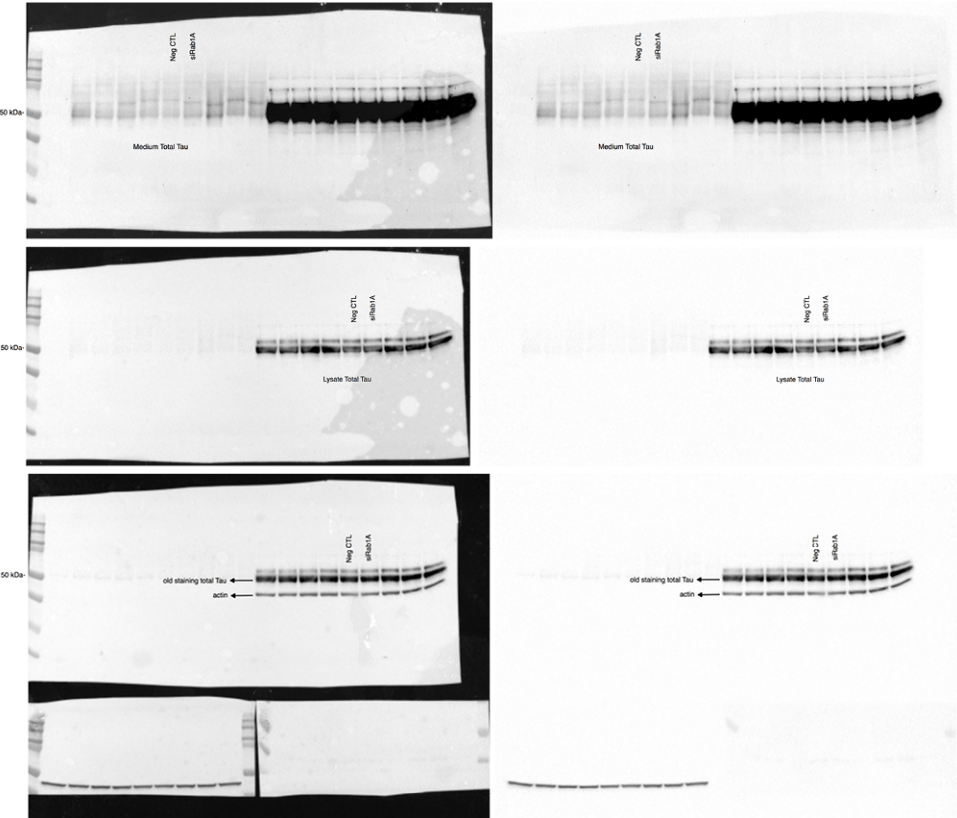



Western Blots Fig7B

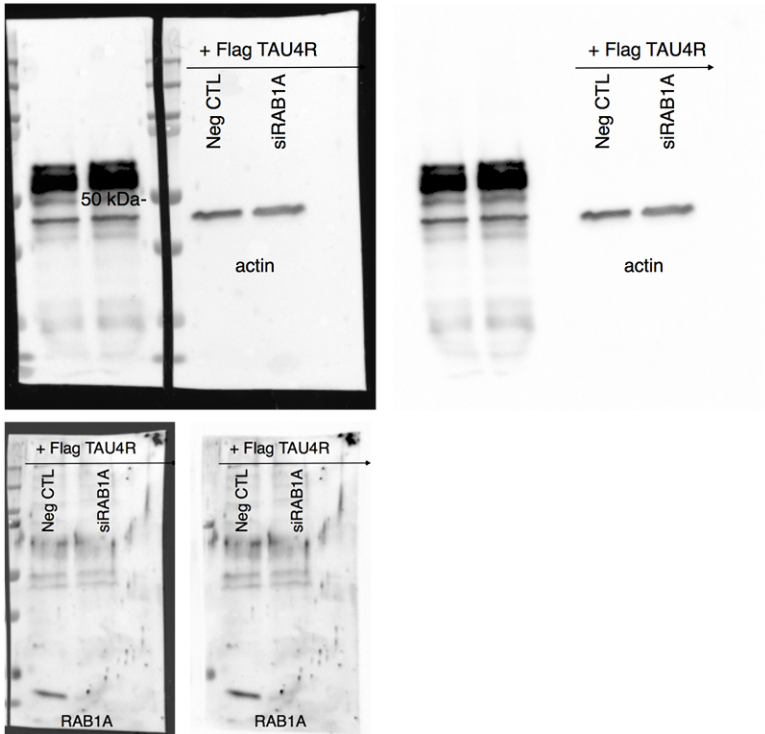

Western Blots Fig7E

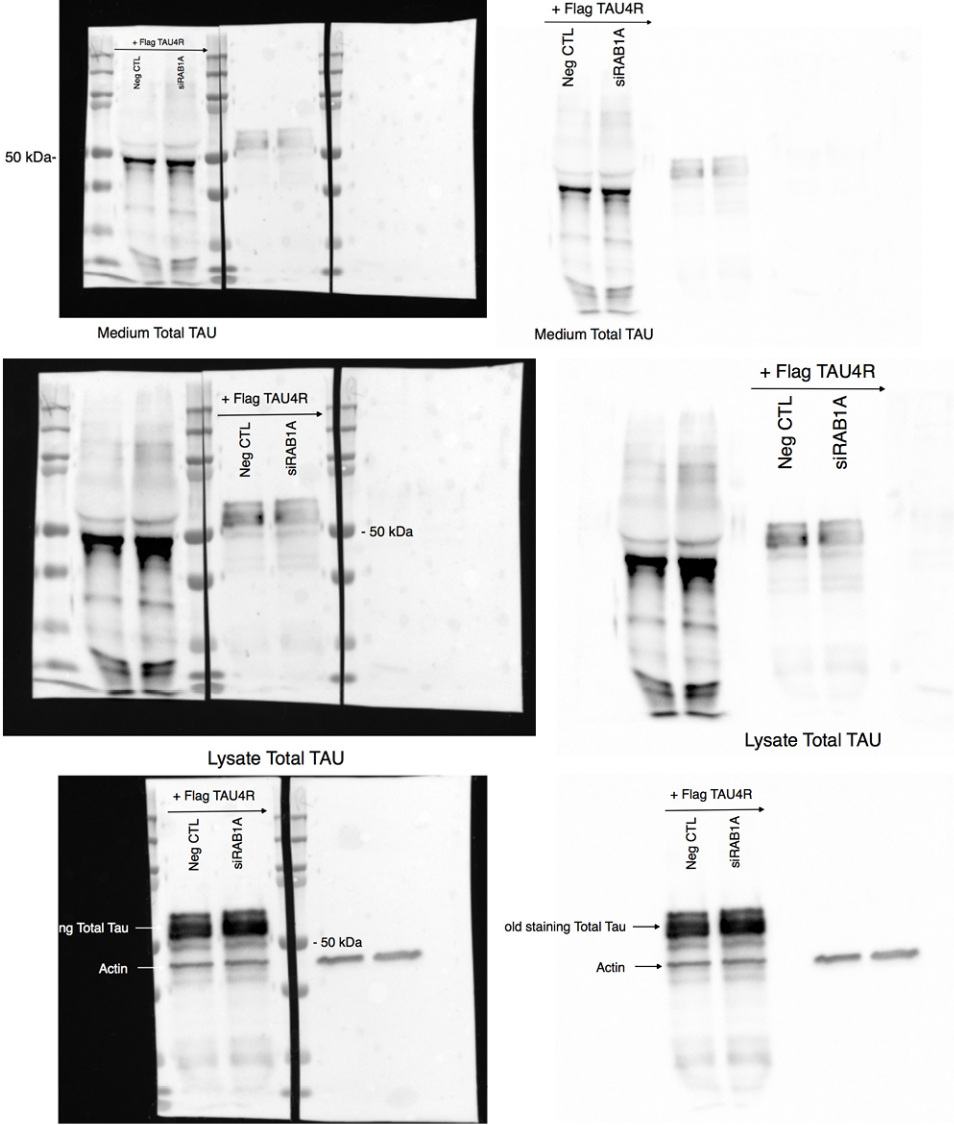

Western Blots Fig7G

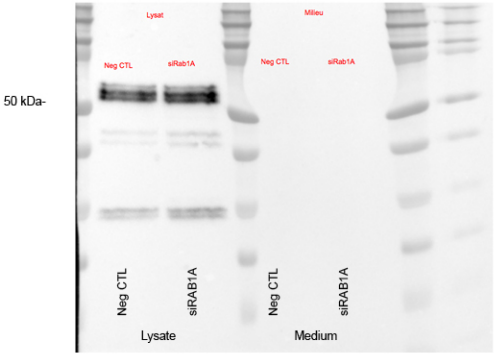

Western Blots FigS2B

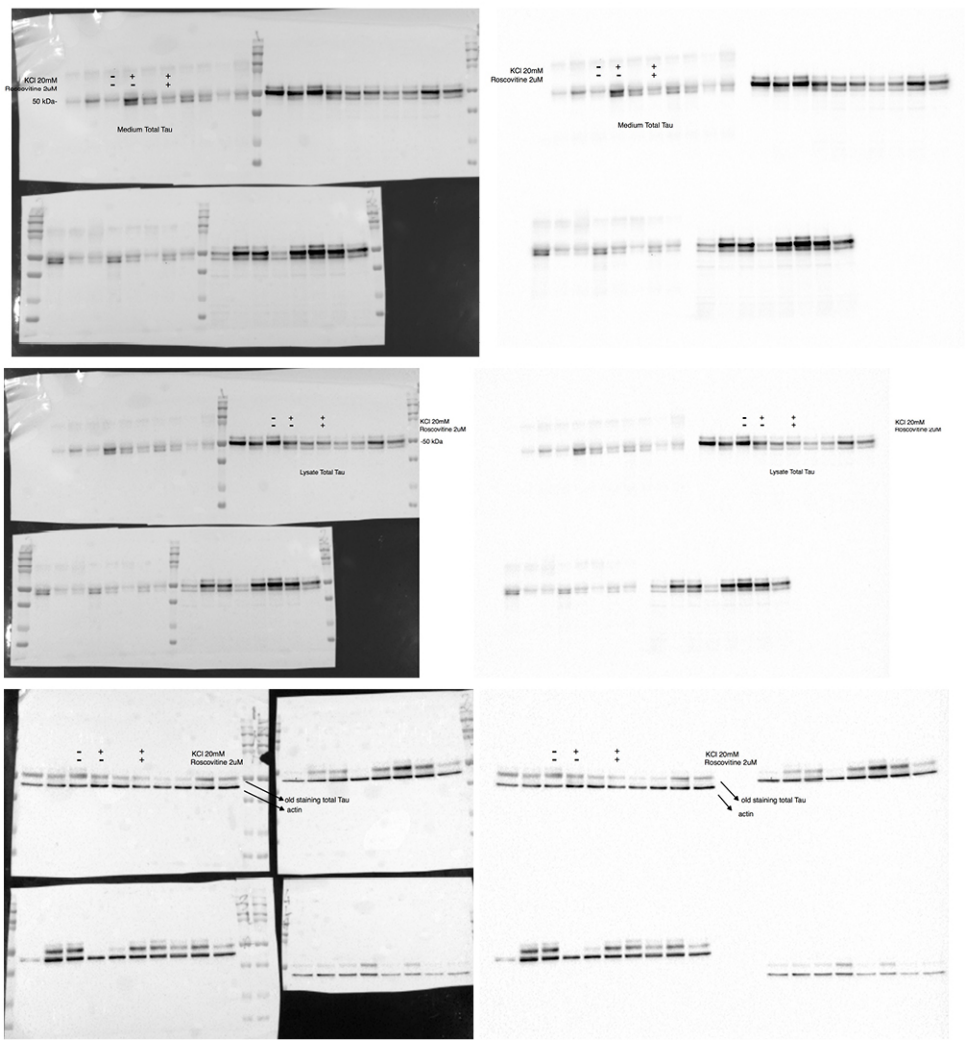

Supplement: Supplementary file [file 1]
